# Supplementary material for: Discovery and Potential Utility of a Novel Non-Invasive Ocular Delivery Platform
Source: MDPI journal article supplement (doi:10.3390/pharmaceutics15092344), 2023-09-19
Supplement: s1 [file s1]

### Supplementary Information

**Supplementary Table S1a.** LC conditions for JV-DE1 in rabbit plasma samples

| Items                    | Detail Information                                                                      |           |         |
|--------------------------|-----------------------------------------------------------------------------------------|-----------|---------|
| Column                   | Waters BEH C18 1.7 $\mu$ m (50 $\times$ 2.10mm)                                         |           |         |
| Column temperature       | 50 °C                                                                                   |           |         |
| Auto-sampler temperature | 4 °C                                                                                    |           |         |
| Mobile Phase             | MPA: 0.1% Formic Acid (FA) in water<br>MPB: 0.1% Formic Acid (FA) in acetonitrile (ACN) |           |         |
| Gradient elution         | Flow rate                                                                               | 0.6ml/min |         |
|                          | Time/min                                                                                | MPA (%)   | MPB (%) |
|                          | Initial                                                                                 | 75.0      | 25.0    |
|                          | 1.30                                                                                    | 5.0       | 95.0    |
|                          | 1.75                                                                                    | 5.0       | 95.0    |
|                          | 1.76                                                                                    | 75.0      | 25.0    |
|                          | 2.00                                                                                    | 75.0      | 25.0    |
| Injection Volume         | 3 $\mu$ L                                                                               |           |         |

**Supplementary Table S1b.** LC conditions for JV-DE1 in rabbit ocular tissues

| Items                    | Detail Information                                                                                                                                         |           |         |
|--------------------------|------------------------------------------------------------------------------------------------------------------------------------------------------------|-----------|---------|
| Column                   | Waters BEH C18 1.7 $\mu$ m (50 $\times$ 2.10mm)                                                                                                            |           |         |
| Column temperature       | 50 °C                                                                                                                                                      |           |         |
| Auto-sampler temperature | 4 °C                                                                                                                                                       |           |         |
| Mobile Phase             | MPA: 0.1% FA and 1mM NH <sub>4</sub> Ac in H <sub>2</sub> O/ACN (95:5, v:v)<br>MPB: 0.1% FA and 1mM NH <sub>4</sub> Ac in H <sub>2</sub> O/ACN (5:95, v:v) |           |         |
| Gradient elution         | Flow rate                                                                                                                                                  | 0.6ml/min |         |
|                          | Time/min                                                                                                                                                   | MPA (%)   | MPB (%) |
|                          | Initial                                                                                                                                                    | 60.0      | 40.0    |
|                          | 1.00                                                                                                                                                       | 2.0       | 98.0    |
|                          | 1.30                                                                                                                                                       | 2.0       | 98.0    |
|                          | 1.31                                                                                                                                                       | 60.0      | 40.0    |
|                          | 1.50                                                                                                                                                       | 60.0      | 40.0    |

| Items            | Detail Information                                  |
|------------------|-----------------------------------------------------|
| Injection Volume | 2μL                                                 |
| Valco Valve      | 0.3min: switch into mass, 0.8min: switch into waste |

**Supplementary Table S1c.** MS conditions for JV-DE1 in rabbit plasma and ocular tissues

| Items                                                | Detail Information                                                |             |                    |           |           |           |            |
|------------------------------------------------------|-------------------------------------------------------------------|-------------|--------------------|-----------|-----------|-----------|------------|
| Ion Source                                           | Ion Spray Voltage: 5500V                                          |             |                    |           |           |           |            |
|                                                      | CAD: 10                                                           |             |                    |           |           |           |            |
|                                                      | CUR: 40psi                                                        |             |                    |           |           |           |            |
|                                                      | Gas1: 55psi                                                       |             |                    |           |           |           |            |
|                                                      | Gas2: 55psi                                                       |             |                    |           |           |           |            |
|                                                      | Temperature: 450°C (plasma); 550°C (eye tissue and aqueous humor) |             |                    |           |           |           |            |
|                                                      | Resolution Q1: unit                                               |             |                    |           |           |           |            |
|                                                      | Resolution Q3: unit                                               |             |                    |           |           |           |            |
| Model                                                | MR Pause: 5.007msec                                               |             |                    |           |           |           |            |
|                                                      | ESI, Positive, MRM                                                |             |                    |           |           |           |            |
| Mass Parameters<br>(plasma)                          | Analyte and IS                                                    | Q1/Q3       | Dwell<br>time (ms) | DP<br>(v) | EP<br>(v) | CE<br>(v) | CXP<br>(v) |
|                                                      | JV-DE1                                                            | 309.8/266.3 | 150                | 150       | 10        | 46        | 13         |
|                                                      | Tolbutamide                                                       | 271.1/172.0 | 150                | 70        | 10        | 18        | 13         |
| Mass Parameters<br>(eye tissue and<br>aqueous humor) | Analyte and IS                                                    | Q1/Q3       | Dwell<br>time (ms) | DP<br>(v) | EP<br>(v) | CE<br>(v) | CXP<br>(v) |
|                                                      | JV-DE1                                                            | 309.8/266.3 | 80                 | 150       | 10        | 46        | 13         |
|                                                      | Tolbutamide                                                       | 271.1/172.0 | 80                 | 70        | 10        | 18        | 13         |

**Supplementary Table S2.** LC/MS process conditions for JV-DE1 in monkey plasma and ocular tissues

LC conditions:

| Time/min | Flow rate (ml/min) | A% | B% |
|----------|--------------------|----|----|
| Initial  | 0.6                | 75 | 25 |
| 1.30     | 0.6                | 5  | 95 |
| 1.75     | 0.6                | 5  | 95 |
| 1.76     | 0.6                | 75 | 25 |
| 2.00     | 0.6                | 75 | 25 |

**Supplementary Table S3.** LC/MS process conditions for JV-MD2 (DHA) in monkey plasma and ocular tissues.

LC conditions:

| Time/min | Flow rate (ml/min) | A% | B% |
|----------|--------------------|----|----|
| Initial  | 0.5                | 40 | 60 |
| 2.20     | 0.5                | 10 | 90 |
| 2.50     | 0.5                | 10 | 90 |
| 2.51     | 0.5                | 40 | 60 |
| 2.90     | 0.5                | 40 | 60 |
